# Supplementary material for: Understanding the Community Perceptions and Knowledge of Bats and Transmission of Nipah Virus in Bangladesh
Source: Animals (Basel). 2020 Oct 5;10(10):1814. doi: 10.3390/ani10101814 (PMC7650626; doi:10.3390/ani10101814)
Supplement: Supplementary file 1 [file animals-10-01814-s001.xlsx]

## Sheet: Data
SL No.	Collector Institution	Sex	Age	Thana	District	Nipah Outbreak Area	Occupation	Educational Qualification	Bats are bird?	Bats are dirty animal?	Bats are blind?	Bats lay egg?	Bats like fox?	Bats eat and defecate in the same place?	Bat always attack human eyes?	All bat suck blood from human?	Bat are a sign of bad things?	Bat meat and bone can cure different diseases?	Bats can entangle in hair?	Bats are important in Nature?	I like to read book about bat?	I am not interested about whether bats in Bangladesh are endangered?	Do you believe that bat are decreasing day by day?	Greater attention should be provided for bat protection?	All bats carry Nipah virus?	Only bats are responsible for nipah outbreaks in Bangladesh?	Even the presence of bats in my house can spread nipah?	I eat bat bitten fruits without washing the fruit?	I can identify fruits that bitten by bat?	Bat spread by nipah by biting human and animal?	Walking under the roosting site can lead to nipah infection?	Bat can only spread nipah through date palm sap?	Drinking boiled date palm sap. One can can eliminate (or reduce) the risk of Nipah infection?
1	Chattogram Veterinary and Animal Sciences University	Male	37	Shivalaya	Manikganj	Yes	Farmer	Primary	SA	A	A	DA	DA	SA	DA	SA	DA	DA	SA	SA	DA	DA	SA	DA	A	DA	DA	A	DA	A	DA	A	SD
2	Chattogram Veterinary and Animal Sciences University	Male	45	Shivalaya	Manikganj	Yes	Farmer	Primary	SA	A	SA	A	SD	SA	SD	SD	SD	SA	SA	SA	SA	SD	SD	DA	DA	DA	DA	SA	SA	SA	SD	SD	SD
3	Chattogram Veterinary and Animal Sciences University	Female	18	Shivalaya	Manikganj	Yes	Student	Secondary	SA	A	A	A	SD	SA	A	DA	SA	SA	SA	SA	SA	DA	DA	SD	SD	SD	DA	DA	DA	DA	SD	SD	SD
4	Chattogram Veterinary and Animal Sciences University	Male	30	Shivalaya	Manikganj	Yes	Farmer	Primary	SA	A	DA	SA	SA	SA	SA	SA	SD	SD	SD	SA	A	SA	SA	SD	SA	SA	SA	DA	DA	SD	SA	SA	A
5	Chattogram Veterinary and Animal Sciences University	Male	35	Shivalaya	Manikganj	Yes	Service	Secondary	SA	A	SA	SA	SD	SA	A	A	DA	SD	SD	SA	SA	SA	SA	SD	SA	DA	SA	SA	SA	DA	DA	SD	DA
6	Chattogram Veterinary and Animal Sciences University	Male	23	Shivalaya	Manikganj	Yes	Businessman	Secondary	SA	A	SA	DA	DA	SA	SA	A	A	SD	SD	SA	SA	A	A	DA	SA	SA	A	A	DA	DA	DA	DA	DA
7	Chattogram Veterinary and Animal Sciences University	Male	28	Shivalaya	Manikganj	Yes	Service	Higher	SA	SA	SA	DA	DA	SA	SA	DA	DA	DA	SD	SA	SA	SA	DA	DA	SA	SA	DA	DA	SD	SD	DA	DA	DA
8	Chattogram Veterinary and Animal Sciences University	Male	18	Shivalaya	Manikganj	Yes	Farmer	Primary	SA	SA	DA	DA	SD	SA	SA	SA	A	DA	DA	SA	SA	SA	A	A	SA	SA	SA	SA	DA	DA	DA	SD	SD
9	Chattogram Veterinary and Animal Sciences University	Male	27	Shivalaya	Manikganj	Yes	Farmer	Primary	SA	A	SA	A	SD	SA	A	DA	DA	DA	DA	SA	SD	SA	A	SD	SA	SA	SA	DA	DA	DA	A	A	A
10	Chattogram Veterinary and Animal Sciences University	Male	22	Shivalaya	Manikganj	Yes	Farmer	Secondary	SA	SA	A	DA	DA	SA	DA	SA	SA	DA	SD	SA	DA	DA	DA	SD	SA	SA	SA	SA	SD	SD	DA	DA	DA
11	Chattogram Veterinary and Animal Sciences University	Male	30	Shivalaya	Manikganj	Yes	Service	Higher	SA	A	A	A	SD	SA	DA	DA	DA	SD	SD	SA	SA	SA	DA	DA	SA	A	DA	DA	SD	DA	DA	DA	DA
12	Chattogram Veterinary and Animal Sciences University	Male	17	Shivalaya	Manikganj	Yes	Student	Secondary	SA	A	SA	DA	A	SA	A	DA	A	DA	SA	SA	DA	A	DA	A	A	DA	A	DA	DA	DA	A	A	A
13	Chattogram Veterinary and Animal Sciences University	Male	19	Shivalaya	Manikganj	Yes	Farmer	Secondary	DA	SA	DA	A	A	DA	DA	DA	DA	DA	SA	DA	DA	DA	A	DA	A	DA	A	DA	A	DA	DA	SA	A
14	Chattogram Veterinary and Animal Sciences University	Male	18	Shivalaya	Manikganj	Yes	Student	Secondary	DA	A	A	DA	SA	SA	DA	DA	DA	A	SA	DA	A	A	DA	DA	DA	A	DA	SA	SA	DA	DA	A	SA
15	Chattogram Veterinary and Animal Sciences University	Male	20	Shivalaya	Manikganj	Yes	Student	Secondary	A	SA	A	DA	A	DA	DA	DA	A	A	SD	A	DA	A	DA	A	DA	DA	DA	DA	SD	DA	A	DA	DA
16	Chattogram Veterinary and Animal Sciences University	Male	35	Shivalaya	Manikganj	Yes	Farmer	Secondary	A	DA	SD	DA	A	A	DA	DA	DA	SD	SA	A	DA	A	SA	DA	DA	DA	DA	SA	A	DA	DA	A	SA
17	Chattogram Veterinary and Animal Sciences University	Male	32	Shivalaya	Manikganj	Yes	Service	Higher	A	DA	A	SD	A	A	DA	DA	SD	DA	SA	DA	DA	DA	A	A	A	SA	DA	DA	DA	DA	DA	A	SA
18	Chattogram Veterinary and Animal Sciences University	Male	35	Shivalaya	Manikganj	Yes	Businessman	Primary	A	DA	DA	SD	DA	A	DA	DA	DA	DA	SD	SA	A	SA	SA	SA	DA	DA	DA	SA	SA	DA	DA	DA	DA
19	Chattogram Veterinary and Animal Sciences University	Male	33	Shivalaya	Manikganj	Yes	Farmer	Primary	DA	DA	DA	SD	DA	A	SD	SD	DA	DA	SD	DA	DA	A	A	A	DA	DA	DA	SD	DA	DA	DA	DA	DA
20	Chattogram Veterinary and Animal Sciences University	Male	38	Shivalaya	Manikganj	Yes	Businessman	Secondary	A	DA	DA	SD	A	A	DA	DA	SD	SD	SA	A	DA	A	A	A	A	SA	DA	DA	A	DA	DA	SA	SA
21	Chattogram Veterinary and Animal Sciences University	Male	40	Shivalaya	Manikganj	Yes	Businessman	Secondary	SA	DA	DA	DA	DA	SA	DA	DA	DA	SA	SA	SA	SD	SA	A	DA	DA	DA	SD	SA	A	A	A	A	SA
22	Chattogram Veterinary and Animal Sciences University	Male	30	Shivalaya	Manikganj	Yes	Service	Higher	SA	A	A	DA	A	A	A	DA	A	A	SA	SA	SA	DA	A	SA	DA	DA	A	SD	SA	A	DA	DA	A
23	Chattogram Veterinary and Animal Sciences University	Male	28	Shivalaya	Manikganj	Yes	Businessman	Secondary	A	SA	DA	DA	A	A	A	DA	A	DA	SA	DA	A	A	DA	DA	A	A	SA	SD	SA	DA	A	DA	DA
24	Chattogram Veterinary and Animal Sciences University	Male	48	Shivalaya	Manikganj	Yes	Farmer	Primary	DA	A	DA	SD	A	A	DA	DA	DA	A	SA	DA	DA	A	DA	DA	A	DA	DA	SA	SA	DA	DA	A	SA
25	Chattogram Veterinary and Animal Sciences University	Male	30	Shivalaya	Manikganj	Yes	Farmer	Primary	SA	A	DA	SD	DA	SA	DA	DA	DA	DA	SA	A	DA	A	A	A	DA	DA	DA	DA	A	DA	DA	DA	A
26	Chattogram Veterinary and Animal Sciences University	Male	30	Shivalaya	Manikganj	Yes	Farmer	Secondary	SA	DA	DA	DA	SD	SA	SD	SD	DA	DA	SA	A	DA	DA	SA	DA	DA	DA	DA	A	SA	DA	DA	A	SA
27	Chattogram Veterinary and Animal Sciences University	Male	27	Shivalaya	Manikganj	Yes	Businessman	Secondary	A	A	A	SD	A	A	DA	DA	DA	DA	SA	DA	DA	A	A	DA	A	A	DA	A	A	DA	DA	A	A
28	Chattogram Veterinary and Animal Sciences University	Male	49	Shivalaya	Manikganj	Yes	Farmer	Secondary	SA	DA	SD	DA	DA	DA	DA	DA	SD	A	SA	A	DA	A	SA	SA	SA	A	DA	DA	DA	DA	DA	A	SA
29	Chattogram Veterinary and Animal Sciences University	Male	52	Shivalaya	Manikganj	Yes	Farmer	Primary	SA	A	DA	SD	SD	SA	SD	DA	DA	DA	SD	A	SD	A	A	A	DA	DA	DA	DA	DA	DA	A	A	A
30	Chattogram Veterinary and Animal Sciences University	Male	40	Shivalaya	Manikganj	Yes	Farmer	Primary	SA	A	DA	DA	A	SA	DA	DA	DA	A	DA	DA	DA	DA	DA	DA	DA	A	DA	DA	SA	DA	DA	SA	A
31	Chattogram Veterinary and Animal Sciences University	Male	23	Shivalaya	Manikganj	Yes	Service	Primary	A	SD	SD	SD	SD	SD	SD	SD	SD	A	SA	SA	SD	SD	SA	SA	DA	DA	SD	SD	SD	DA	SD	A	SD
32	Chattogram Veterinary and Animal Sciences University	Male	30	Shivalaya	Manikganj	Yes	Service	Secondary	DA	SD	SD	SD	SD	SA	SD	SD	SD	SA	SA	A	A	A	SA	SA	DA	DA	DA	SA	SA	DA	DA	DA	SD
33	Chattogram Veterinary and Animal Sciences University	Male	49	Shivalaya	Manikganj	Yes	Businessman	Primary	SA	SD	SD	A	DA	A	DA	SD	SD	DA	DA	DA	A	A	DA	DA	DA	SD	SA	SA	SD	SD	A	SD	A
34	Chattogram Veterinary and Animal Sciences University	Male	26	Shivalaya	Manikganj	Yes	Service	Primary	A	A	A	DA	A	A	DA	DA	A	A	SA	A	A	A	SA	A	DA	A	DA	DA	A	DA	DA	A	A
35	Chattogram Veterinary and Animal Sciences University	Male	21	Shivalaya	Manikganj	Yes	Businessman	Secondary	SA	DA	DA	DA	DA	DA	DA	DA	A	DA	SA	DA	DA	DA	A	DA	DA	DA	A	SD	SA	A	A	A	A
36	Chattogram Veterinary and Animal Sciences University	Male	25	Shivalaya	Manikganj	Yes	Farmer	Primary	A	A	DA	DA	A	DA	DA	DA	DA	A	SA	DA	DA	A	SA	DA	A	A	DA	DA	A	DA	DA	A	A
37	Chattogram Veterinary and Animal Sciences University	Male	26	Shivalaya	Manikganj	Yes	Businessman	Primary	SA	DA	DA	DA	DA	A	DA	DA	A	A	SA	DA	A	DA	DA	DA	DA	DA	A	SD	SA	A	A	DA	SA
38	Chattogram Veterinary and Animal Sciences University	Male	20	Shivalaya	Manikganj	Yes	Student	Higher	SA	SA	SA	DA	SA	SA	DA	SA	SA	SA	SA	DA	DA	DA	SA	SA	DA	DA	SA	SA	DA	SA	SA	SA	SA
39	Chattogram Veterinary and Animal Sciences University	Male	37	Shivalaya	Manikganj	Yes	Businessman	Primary	A	DA	DA	DA	A	A	DA	DA	DA	SA	SA	A	DA	A	SA	DA	DA	A	SA	A	A	DA	A	DA	A
40	Chattogram Veterinary and Animal Sciences University	Male	55	Shivalaya	Manikganj	Yes	Farmer	Primary	DA	A	A	DA	DA	SA	DA	SD	DA	DA	SA	DA	DA	SA	DA	DA	DA	DA	A	SD	SA	A	A	A	A
41	Chattogram Veterinary and Animal Sciences University	Male	48	Shivalaya	Manikganj	Yes	Businessman	Higher	A	A	DA	DA	DA	DA	DA	DA	A	A	SA	A	A	DA	A	A	DA	DA	DA	DA	A	A	DA	DA	A
42	Chattogram Veterinary and Animal Sciences University	Male	45	Shivalaya	Manikganj	Yes	Farmer	Primary	A	A	SA	SD	A	A	DA	DA	A	SA	SA	SD	SD	SD	SD	SD	SA	A	DA	A	SD	SA	A	SD	A
43	Chattogram Veterinary and Animal Sciences University	Male	39	Shivalaya	Manikganj	Yes	Businessman	Secondary	A	SA	SA	SA	SA	SA	DA	SD	DA	SA	SA	DA	A	A	DA	DA	DA	SA	A	SD	SA	SA	SD	DA	DA
44	Chattogram Veterinary and Animal Sciences University	Male	30	Shivalaya	Manikganj	Yes	Businessman	Secondary	SA	SA	DA	SD	DA	DA	DA	DA	DA	A	DA	DA	A	DA	DA	A	DA	DA	DA	SD	SA	A	SD	DA	SA
45	Chattogram Veterinary and Animal Sciences University	Male	36	Shivalaya	Manikganj	Yes	Businessman	Secondary	SA	A	SA	DA	DA	DA	DA	DA	A	DA	DA	DA	A	A	DA	A	A	A	A	DA	A	A	A	A	A
46	Chattogram Veterinary and Animal Sciences University	Male	54	Shivalaya	Manikganj	Yes	Businessman	Primary	A	SA	SD	SA	SA	DA	DA	DA	A	A	SA	A	DA	A	A	DA	DA	A	DA	SA	A	DA	A	SA	SA
47	Chattogram Veterinary and Animal Sciences University	Male	38	Shivalaya	Manikganj	Yes	Businessman	Primary	DA	DA	DA	DA	A	DA	DA	DA	DA	A	SA	SA	DA	A	SA	A	DA	A	DA	A	DA	DA	A	A	A
48	Chattogram Veterinary and Animal Sciences University	Male	32	Shivalaya	Manikganj	Yes	Businessman	Secondary	SA	A	DA	DA	A	DA	DA	DA	DA	DA	SA	DA	DA	A	SA	A	DA	DA	DA	DA	A	DA	DA	A	A
49	Chattogram Veterinary and Animal Sciences University	Male	34	Puthia	Rajshahi	No	Businessman	Secondary	SA	SA	DA	DA	A	DA	DA	DA	DA	DA	SA	DA	DA	A	SA	DA	DA	A	DA	A	A	DA	DA	A	A
50	Chattogram Veterinary and Animal Sciences University	Male	48	Puthia	Rajshahi	No	Service	Primary	SA	A	DA	SD	A	DA	DA	DA	DA	DA	SA	DA	DA	A	SA	DA	DA	DA	DA	DA	A	DA	DA	A	A
51	Chattogram Veterinary and Animal Sciences University	Male	32	Puthia	Rajshahi	No	Farmer	Secondary	A	DA	A	DA	SD	SA	DA	A	A	A	DA	DA	DA	DA	A	DA	A	A	DA	SD	A	A	DA	A	DA
52	Chattogram Veterinary and Animal Sciences University	Male	29	Puthia	Rajshahi	No	Service	Higher	DA	DA	A	DA	DA	A	DA	DA	DA	A	DA	SA	DA	A	A	A	A	A	A	DA	A	A	A	A	DA
53	Chattogram Veterinary and Animal Sciences University	Male	26	Puthia	Rajshahi	No	Farmer	Primary	A	A	A	DA	DA	A	A	DA	A	DA	DA	A	DA	A	A	A	A	A	A	SD	A	DA	A	DA	DA
54	Chattogram Veterinary and Animal Sciences University	Male	25	Puthia	Rajshahi	No	Student	Secondary	SD	DA	DA	SD	DA	SA	DA	SD	DA	DA	DA	SA	DA	SD	DA	A	A	SA	A	A	SD	SA	A	A	DA
55	Chattogram Veterinary and Animal Sciences University	Male	47	Puthia	Rajshahi	No	Service	Secondary	A	A	A	DA	DA	A	DA	DA	DA	A	SA	A	DA	SD	A	DA	DA	A	A	SA	A	A	A	SD	A
56	Chattogram Veterinary and Animal Sciences University	Male	33	Puthia	Rajshahi	No	Farmer	Primary	A	DA	SD	SA	A	DA	A	DA	DA	A	SA	A	SD	A	A	A	A	SA	A	DA	SD	DA	A	A	DA
57	Chattogram Veterinary and Animal Sciences University	Female	29	Puthia	Rajshahi	No	Student	Higher	DA	DA	DA	DA	DA	DA	DA	DA	SD	A	SA	SA	SA	SD	A	A	DA	A	A	SD	A	A	DA	DA	SA
58	Chattogram Veterinary and Animal Sciences University	Male	38	Puthia	Rajshahi	No	other	Primary	A	A	A	DA	SD	A	DA	DA	A	A	DA	A	SD	DA	A	DA	DA	A	DA	SD	A	A	DA	DA	DA
59	Chattogram Veterinary and Animal Sciences University	Male	24	Puthia	Rajshahi	No	Student	Secondary	SD	DA	DA	SD	DA	SA	DA	DA	DA	DA	DA	SA	A	DA	A	A	SA	A	A	DA	A	A	A	A	DA
60	Chattogram Veterinary and Animal Sciences University	Male	34	Puthia	Rajshahi	No	Farmer	Primary	A	DA	A	DA	DA	DA	DA	DA	A	DA	DA	A	SD	A	A	DA	DA	DA	DA	DA	SA	DA	DA	DA	DA
61	Chattogram Veterinary and Animal Sciences University	Male	46	Puthia	Rajshahi	No	Farmer	Primary	SA	A	A	DA	DA	A	A	DA	A	A	SA	DA	DA	A	A	DA	A	DA	A	SD	A	DA	A	DA	DA
62	Chattogram Veterinary and Animal Sciences University	Male	40	Puthia	Rajshahi	No	Farmer	Primary	A	A	DA	DA	DA	SA	A	DA	DA	DA	DA	A	DA	DA	A	DA	DA	DA	DA	SD	A	DA	A	DA	DA
63	Chattogram Veterinary and Animal Sciences University	Male	41	Puthia	Rajshahi	No	Businessman	Primary	SA	DA	A	DA	DA	SA	A	A	A	DA	DA	A	DA	A	DA	A	DA	A	A	DA	A	DA	A	DA	DA
64	Chattogram Veterinary and Animal Sciences University	Male	36	Puthia	Rajshahi	No	Farmer	Primary	SA	A	A	DA	DA	SA	A	DA	A	A	DA	DA	DA	A	A	A	DA	A	DA	SA	DA	A	DA	DA	DA
65	Chattogram Veterinary and Animal Sciences University	Male	25	Puthia	Rajshahi	No	Farmer	Primary	SA	A	SA	DA	DA	SA	A	DA	A	DA	DA	A	DA	DA	A	DA	A	SA	A	DA	A	A	DA	DA	DA
66	Chattogram Veterinary and Animal Sciences University	Male	28	Puthia	Rajshahi	No	Businessman	Secondary	DA	DA	DA	DA	SD	SA	DA	DA	DA	DA	DA	SA	DA	DA	A	A	A	A	DA	DA	A	DA	A	A	A
67	Chattogram Veterinary and Animal Sciences University	Male	26	Puthia	Rajshahi	No	Service	Higher	SD	DA	DA	SD	DA	SA	DA	A	DA	DA	DA	A	A	DA	A	DA	A	DA	DA	DA	A	DA	DA	DA	SD
68	Chattogram Veterinary and Animal Sciences University	Male	30	Puthia	Rajshahi	No	Businessman	Secondary	DA	DA	A	DA	DA	A	DA	A	DA	DA	DA	A	DA	SD	A	A	A	DA	A	SD	A	DA	A	DA	A
69	Chattogram Veterinary and Animal Sciences University	Male	32	Puthia	Rajshahi	No	Farmer	Primary	SA	A	SA	DA	DA	SA	DA	A	A	DA	SA	SA	DA	A	A	DA	DA	A	DA	SD	SA	DA	DA	DA	DA
70	Chattogram Veterinary and Animal Sciences University	Male	39	Puthia	Rajshahi	No	Farmer	Primary	SA	A	SA	A	A	A	DA	DA	A	DA	DA	A	DA	DA	A	A	A	DA	A	SD	SA	A	DA	DA	DA
71	Chattogram Veterinary and Animal Sciences University	Male	25	Puthia	Rajshahi	No	Service	Secondary	DA	DA	DA	DA	DA	SA	DA	SD	DA	A	DA	SA	DA	A	A	A	A	A	A	SD	SA	A	A	A	DA
72	Chattogram Veterinary and Animal Sciences University	Male	45	Puthia	Rajshahi	No	Farmer	Primary	SA	A	A	DA	A	SA	SD	DA	A	DA	DA	A	SD	A	DA	DA	A	DA	A	SD	SA	A	DA	DA	A
73	Chattogram Veterinary and Animal Sciences University	Male	21	Puthia	Rajshahi	No	Student	Secondary	DA	DA	A	DA	DA	SA	DA	A	DA	A	DA	A	A	DA	A	A	DA	SA	A	DA	A	DA	A	DA	DA
74	Chattogram Veterinary and Animal Sciences University	Male	38	Puthia	Rajshahi	No	Farmer	Secondary	A	DA	A	DA	SD	SA	DA	DA	A	DA	DA	DA	SD	DA	A	A	DA	DA	DA	SD	SA	A	DA	A	DA
75	Chattogram Veterinary and Animal Sciences University	Male	33	Puthia	Rajshahi	No	Farmer	Primary	SA	A	SA	A	DA	SA	DA	A	A	DA	DA	A	DA	A	A	DA	A	A	DA	SD	SA	DA	A	DA	DA
76	Chattogram Veterinary and Animal Sciences University	Male	39	Puthia	Rajshahi	No	Businessman	Primary	A	A	SA	DA	DA	SA	DA	SD	DA	A	DA	A	SD	A	SA	DA	DA	DA	A	SD	SA	DA	DA	DA	DA
77	Chattogram Veterinary and Animal Sciences University	Male	24	Puthia	Rajshahi	No	Businessman	Primary	DA	DA	DA	SA	DA	SA	DA	SD	DA	A	DA	DA	A	DA	A	A	A	A	SA	SD	A	A	DA	A	DA
78	Chattogram Veterinary and Animal Sciences University	Male	45	Puthia	Rajshahi	No	Farmer	Primary	SA	A	A	DA	A	A	DA	A	SA	DA	DA	A	DA	DA	A	A	DA	DA	DA	SD	SA	DA	A	DA	DA
79	Chattogram Veterinary and Animal Sciences University	Male	42	Puthia	Rajshahi	No	Businessman	Primary	A	DA	A	A	SD	SA	DA	DA	A	DA	A	DA	DA	A	DA	A	A	A	DA	A	DA	DA	A	DA	A
80	Chattogram Veterinary and Animal Sciences University	Male	28	Puthia	Rajshahi	No	Farmer	Primary	SA	DA	A	DA	SD	A	SD	DA	A	DA	DA	A	DA	A	DA	A	DA	A	DA	A	A	A	SD	A	DA
81	Chattogram Veterinary and Animal Sciences University	Female	32	Puthia	Rajshahi	No	Farmer	Secondary	A	A	SA	A	DA	SA	SD	DA	DA	A	DA	A	DA	DA	A	SA	DA	A	DA	SD	A	A	A	A	DA
82	Chattogram Veterinary and Animal Sciences University	Female	37	Puthia	Rajshahi	No	Farmer	Primary	SA	SA	A	SA	DA	A	SD	DA	SD	A	DA	DA	A	A	DA	DA	A	DA	DA	SD	A	A	DA	A	DA
83	Chattogram Veterinary and Animal Sciences University	Male	45	Puthia	Rajshahi	No	Service	Primary	A	A	DA	DA	A	DA	A	A	A	DA	DA	DA	A	A	A	A	DA	DA	A	DA	A	A	DA	DA	SA
84	Chattogram Veterinary and Animal Sciences University	Male	35	Puthia	Rajshahi	No	Farmer	Primary	A	DA	A	DA	DA	A	DA	DA	DA	DA	SA	DA	A	A	A	A	DA	A	DA	DA	A	DA	DA	A	A
85	Chattogram Veterinary and Animal Sciences University	Male	40	Puthia	Rajshahi	No	Farmer	Higher	SA	A	DA	A	A	DA	DA	DA	A	SA	A	A	A	A	A	A	A	DA	DA	SD	SA	A	A	A	A
86	Chattogram Veterinary and Animal Sciences University	Female	40	Puthia	Rajshahi	No	Farmer	Primary	SA	SA	SD	SA	DA	A	DA	SD	SA	DA	DA	A	DA	A	A	SD	SD	A	DA	DA	SD	A	DA	A	DA
87	Chattogram Veterinary and Animal Sciences University	Male	46	Puthia	Rajshahi	No	Farmer	Primary	A	A	DA	DA	A	A	DA	DA	DA	A	SA	A	DA	DA	A	A	DA	DA	A	SD	SA	DA	DA	A	A
88	Chattogram Veterinary and Animal Sciences University	Male	27	Puthia	Rajshahi	No	Student	Higher	SA	SA	SA	SD	SD	SD	SA	SA	SA	SA	SD	SA	SA	A	A	SA	SD	A	SA	SA	A	A	SA	SA	SA
89	Chattogram Veterinary and Animal Sciences University	Female	24	Puthia	Rajshahi	No	Student	Higher	SA	SA	SA	SD	SD	SD	SA	SA	SA	SA	SD	SA	SA	A	SA	SA	SD	DA	A	SD	SA	SA	DA	SA	SA
90	Chattogram Veterinary and Animal Sciences University	Female	24	Puthia	Rajshahi	No	Student	Higher	SA	SA	SD	DA	A	A	SA	DA	A	A	SA	SD	SD	A	A	SA	DA	A	SA	SA	SA	A	A	SA	SA
91	Chattogram Veterinary and Animal Sciences University	Female	55	Puthia	Rajshahi	No	Farmer	Primary	SA	DA	SA	SA	SD	SD	DA	DA	DA	DA	DA	SD	SD	SD	SD	SD	SD	SA	DA	A	SD	SA	SA	A	A
92	Chattogram Veterinary and Animal Sciences University	Female	28	Puthia	Rajshahi	No	Student	Higher	SA	SA	SA	DA	DA	A	SA	SD	A	A	SD	SD	SD	A	A	A	A	DA	SA	A	SA	A	DA	A	SA
93	Chattogram Veterinary and Animal Sciences University	Male	37	Puthia	Rajshahi	No	Service	Higher	SA	SA	A	A	DA	A	A	DA	SA	DA	SD	SD	A	SA	A	SD	SA	A	A	A	A	SA	A	A	SD
94	Chattogram Veterinary and Animal Sciences University	Male	24	Puthia	Rajshahi	No	Service	Secondary	SA	SA	SD	SD	SD	SD	SA	SD	DA	A	DA	A	SD	SA	DA	A	SA	A	SD	A	A	DA	SA	SA	SA
95	Chattogram Veterinary and Animal Sciences University	Male	36	Puthia	Rajshahi	No	Service	Higher	SA	SA	SA	SD	DA	SA	DA	DA	A	DA	DA	DA	DA	A	DA	A	SA	A	SA	A	A	A	DA	SA	SA
96	Chattogram Veterinary and Animal Sciences University	Male	70	Puthia	Rajshahi	No	Farmer	Primary	DA	A	A	SD	A	SA	DA	DA	A	A	DA	SA	A	DA	A	DA	DA	DA	A	SA	A	A	DA	DA	SA
97	Chattogram Veterinary and Animal Sciences University	Male	22	Puthia	Rajshahi	No	Student	Secondary	SA	A	SA	SD	A	DA	DA	DA	SA	SA	SA	DA	DA	A	SA	DA	DA	A	A	DA	A	A	A	A	A
98	Chattogram Veterinary and Animal Sciences University	Male	21	Puthia	Rajshahi	No	Student	Higher	A	SA	SA	DA	DA	DA	A	DA	DA	DA	SD	A	SA	A	SA	SD	A	SA	DA	DA	DA	SA	DA	SA	DA
99	Chattogram Veterinary and Animal Sciences University	Male	20	Puthia	Rajshahi	No	Student	Higher	DA	SD	A	DA	A	SD	DA	DA	DA	A	DA	A	A	A	SA	SD	DA	SA	DA	DA	SD	A	DA	SA	SD
100	Chattogram Veterinary and Animal Sciences University	Male	25	Puthia	Rajshahi	No	Student	Secondary	A	DA	SD	SD	A	SD	SD	SD	SD	SA	SA	DA	DA	A	SA	A	A	DA	A	A	A	A	DA	DA	DA
101	Chattogram Veterinary and Animal Sciences University	Male	22	Puthia	Rajshahi	No	Student	Higher	A	DA	A	DA	DA	DA	DA	DA	DA	DA	DA	A	A	DA	SA	A	DA	A	DA	SD	A	SD	SD	A	DA
102	Chattogram Veterinary and Animal Sciences University	Male	26	Faridpur Sadar	Faridpur	Yes	Farmer	Primary	A	A	SD	SD	SD	DA	DA	SD	DA	SA	DA	SA	A	DA	DA	DA	DA	A	DA	DA	SA	SA	A	A	A
103	Chattogram Veterinary and Animal Sciences University	Male	45	Faridpur Sadar	Faridpur	Yes	Farmer	Primary	A	A	DA	SD	DA	A	DA	DA	DA	A	SA	DA	DA	DA	A	A	DA	DA	A	A	SA	A	A	DA	SA
104	Chattogram Veterinary and Animal Sciences University	Male	26	Faridpur Sadar	Faridpur	Yes	Farmer	Primary	DA	A	DA	SD	SD	A	DA	DA	A	A	DA	A	DA	A	A	DA	DA	A	DA	A	SA	A	A	A	A
105	Chattogram Veterinary and Animal Sciences University	Male	37	Faridpur Sadar	Faridpur	Yes	Farmer	Primary	SA	A	A	DA	DA	SA	DA	SA	DA	DA	SA	SA	DA	DA	SA	DA	A	DA	DA	A	DA	A	DA	A	SD
106	Chattogram Veterinary and Animal Sciences University	Male	40	Faridpur Sadar	Faridpur	Yes	Farmer	Primary	SA	A	SA	A	SD	SA	SD	SD	SD	SA	SA	SA	SA	SD	SD	DA	DA	DA	DA	SA	SA	SA	SD	SD	SD
107	Chattogram Veterinary and Animal Sciences University	Female	23	Faridpur Sadar	Faridpur	Yes	Student	Secondary	SA	A	A	A	SD	SA	A	DA	SA	SA	SA	SA	SA	DA	DA	SD	SD	SD	DA	DA	DA	DA	SD	SD	SD
108	Chattogram Veterinary and Animal Sciences University	Male	30	Faridpur Sadar	Faridpur	Yes	Farmer	Primary	SA	A	DA	SA	SA	SA	SA	SA	SD	SD	SD	SA	A	SA	SA	A	A	SA	SA	DA	DA	SD	SA	SA	A
109	Chattogram Veterinary and Animal Sciences University	Male	35	Faridpur Sadar	Faridpur	Yes	Service	Secondary	SA	A	SA	SA	SD	SA	A	A	DA	SD	SD	SA	SA	SA	SA	SD	SA	DA	SA	SA	SA	DA	DA	SD	DA
110	Chattogram Veterinary and Animal Sciences University	Male	23	Faridpur Sadar	Faridpur	Yes	Businessman	Secondary	SA	A	SA	DA	DA	SA	SA	A	A	SD	SD	SA	SA	A	A	DA	SA	SA	A	A	DA	DA	DA	DA	DA
111	Chattogram Veterinary and Animal Sciences University	Male	28	Faridpur Sadar	Faridpur	Yes	Service	Secondary	SA	SA	SA	DA	DA	SA	SA	DA	DA	DA	SD	SA	SA	SA	DA	DA	SD	SA	DA	DA	SD	SD	DA	DA	DA
112	Chattogram Veterinary and Animal Sciences University	Male	22	Faridpur Sadar	Faridpur	Yes	Farmer	Primary	SA	SA	DA	DA	SD	SA	SA	SA	A	DA	DA	SA	SA	SA	A	A	SA	SA	SA	SA	DA	DA	DA	SD	SD
113	Chattogram Veterinary and Animal Sciences University	Male	27	Faridpur Sadar	Faridpur	Yes	Farmer	Primary	SA	A	SA	A	SD	SA	A	DA	DA	A	DA	SA	SD	SA	A	SD	SD	SA	SA	DA	DA	DA	A	A	A
114	Chattogram Veterinary and Animal Sciences University	Male	22	Faridpur Sadar	Faridpur	Yes	Farmer	Secondary	A	SA	A	DA	DA	SA	DA	SA	SA	DA	SD	SA	DA	DA	DA	A	SA	SA	SA	SA	SD	SD	DA	DA	DA
115	Chattogram Veterinary and Animal Sciences University	Male	30	Faridpur Sadar	Faridpur	Yes	Service	Higher	SA	A	A	A	SD	SA	DA	DA	DA	SD	SD	SA	SA	SA	DA	DA	DA	A	DA	DA	SD	DA	DA	DA	DA
116	Chattogram Veterinary and Animal Sciences University	Male	23	Faridpur Sadar	Faridpur	Yes	Student	Secondary	SA	A	SA	DA	A	SA	A	DA	A	DA	SA	SA	DA	A	DA	A	A	DA	A	DA	DA	DA	A	A	A
117	Chattogram Veterinary and Animal Sciences University	Male	19	Faridpur Sadar	Faridpur	Yes	Farmer	Secondary	DA	SA	DA	A	A	DA	DA	DA	DA	DA	SA	DA	DA	DA	A	DA	A	DA	A	DA	A	DA	DA	SA	A
118	Chattogram Veterinary and Animal Sciences University	Male	22	Faridpur Sadar	Faridpur	Yes	Student	Secondary	DA	A	A	DA	SA	SA	DA	DA	DA	A	SA	DA	A	A	DA	DA	DA	DA	DA	SA	SA	DA	DA	A	SA
119	Chattogram Veterinary and Animal Sciences University	Male	24	Faridpur Sadar	Faridpur	Yes	Student	Secondary	A	SA	A	DA	A	DA	DA	DA	A	A	SD	A	DA	A	DA	DA	DA	DA	DA	DA	SD	DA	A	DA	DA
120	Chattogram Veterinary and Animal Sciences University	Male	35	Faridpur Sadar	Faridpur	Yes	Farmer	Secondary	A	DA	SD	DA	A	A	DA	DA	DA	SD	SA	A	DA	A	SA	DA	DA	DA	DA	SA	A	DA	DA	A	SA
121	Chattogram Veterinary and Animal Sciences University	Male	32	Faridpur Sadar	Faridpur	Yes	Service	Higher	A	DA	A	SD	A	A	DA	DA	SD	DA	SA	DA	DA	DA	A	A	A	DA	DA	DA	DA	DA	DA	A	SA
122	Chattogram Veterinary and Animal Sciences University	Male	35	Faridpur Sadar	Faridpur	Yes	Businessman	Primary	A	DA	DA	SD	DA	A	DA	DA	DA	A	SD	SA	A	SA	SA	SA	DA	DA	DA	SA	SA	DA	DA	DA	DA
123	Chattogram Veterinary and Animal Sciences University	Female	33	Faridpur Sadar	Faridpur	Yes	other	Primary	DA	DA	DA	SD	DA	A	SD	SD	DA	DA	SD	DA	DA	A	A	A	DA	DA	DA	SD	DA	DA	DA	DA	DA
124	Chattogram Veterinary and Animal Sciences University	Male	38	Faridpur Sadar	Faridpur	Yes	Businessman	Secondary	A	DA	DA	SD	A	A	DA	DA	SD	SD	SA	A	DA	A	A	A	A	DA	DA	DA	A	DA	DA	SA	SA
125	Chattogram Veterinary and Animal Sciences University	Male	33	Faridpur Sadar	Faridpur	Yes	Businessman	Secondary	SA	DA	DA	DA	DA	SA	DA	DA	DA	SA	SA	SA	SD	SA	A	DA	DA	DA	SD	SA	A	A	A	A	SA
126	Chattogram Veterinary and Animal Sciences University	Male	30	Faridpur Sadar	Faridpur	Yes	Service	Higher	SA	A	A	DA	A	A	A	DA	A	A	SA	SA	SA	DA	A	SA	DA	DA	A	SD	SA	A	DA	DA	A
127	Chattogram Veterinary and Animal Sciences University	Male	28	Faridpur Sadar	Faridpur	Yes	Businessman	Secondary	A	SA	DA	DA	A	A	A	DA	A	DA	SA	DA	A	A	DA	DA	A	A	SA	SD	SA	DA	A	DA	DA
128	Chattogram Veterinary and Animal Sciences University	Male	48	Faridpur Sadar	Faridpur	Yes	Farmer	Primary	DA	A	DA	SD	A	A	DA	DA	DA	A	SA	DA	DA	A	DA	DA	A	DA	DA	SA	SA	DA	DA	A	SA
129	Chattogram Veterinary and Animal Sciences University	Male	30	Faridpur Sadar	Faridpur	Yes	Farmer	Primary	SA	A	DA	SD	DA	SA	DA	DA	DA	DA	SA	A	DA	A	A	A	DA	A	DA	DA	A	DA	DA	DA	A
130	Chattogram Veterinary and Animal Sciences University	Male	30	Faridpur Sadar	Faridpur	Yes	Farmer	Secondary	SA	DA	DA	DA	SD	SA	SD	SD	DA	DA	SA	A	DA	DA	SA	DA	DA	DA	DA	A	SA	DA	DA	A	SA
131	Chattogram Veterinary and Animal Sciences University	Male	27	Faridpur Sadar	Faridpur	Yes	Farmer	Secondary	A	A	A	SD	A	A	DA	DA	DA	A	SA	DA	DA	A	A	DA	A	A	DA	A	A	DA	DA	A	A
132	Chattogram Veterinary and Animal Sciences University	Male	49	Faridpur Sadar	Faridpur	Yes	Farmer	Secondary	SA	DA	SD	DA	DA	DA	DA	DA	SD	A	SA	A	DA	A	SA	SA	SA	A	DA	DA	DA	DA	DA	A	SA
133	Chattogram Veterinary and Animal Sciences University	Male	58	Faridpur Sadar	Faridpur	Yes	Farmer	Primary	SA	A	DA	SD	SD	SA	SD	DA	DA	DA	SD	A	SD	A	A	A	DA	DA	DA	DA	DA	DA	A	A	A
134	Chattogram Veterinary and Animal Sciences University	Male	40	Faridpur Sadar	Faridpur	Yes	Farmer	Primary	SA	A	DA	DA	A	SA	DA	DA	DA	A	DA	DA	DA	DA	DA	DA	DA	SA	DA	DA	SA	DA	DA	SA	A
135	Chattogram Veterinary and Animal Sciences University	Male	23	Faridpur Sadar	Faridpur	Yes	Service	Primary	A	SD	SD	SD	SD	SD	A	SD	SD	A	SA	SA	SD	SD	SA	SA	DA	DA	SD	SD	SD	DA	SD	A	SD
136	Chattogram Veterinary and Animal Sciences University	Male	30	Faridpur Sadar	Faridpur	Yes	Service	Secondary	DA	DA	SD	SD	SD	SA	SD	SD	SD	SA	SA	A	A	A	SA	SA	DA	A	DA	SA	SA	DA	DA	DA	SD
137	Chattogram Veterinary and Animal Sciences University	Male	53	Faridpur Sadar	Faridpur	Yes	Businessman	Secondary	SA	SD	SD	A	DA	A	DA	SD	SD	DA	DA	DA	A	A	DA	DA	DA	SD	SA	SA	SD	SD	A	SD	A
138	Chattogram Veterinary and Animal Sciences University	Male	26	Faridpur Sadar	Faridpur	Yes	Service	Primary	A	A	A	DA	A	A	DA	DA	A	A	SA	A	A	A	SA	A	DA	A	DA	DA	A	DA	DA	A	A
139	Chattogram Veterinary and Animal Sciences University	Male	21	Faridpur Sadar	Faridpur	Yes	Businessman	Secondary	SA	DA	DA	DA	DA	DA	DA	DA	A	DA	SA	DA	DA	DA	A	DA	DA	DA	A	SD	SA	A	A	A	A
140	Chattogram Veterinary and Animal Sciences University	Male	25	Faridpur Sadar	Faridpur	Yes	Farmer	Primary	A	A	DA	DA	A	DA	DA	DA	DA	A	SA	DA	DA	A	SA	DA	A	A	DA	DA	A	DA	DA	A	A
141	Chattogram Veterinary and Animal Sciences University	Male	26	Faridpur Sadar	Faridpur	Yes	Businessman	Primary	SA	DA	DA	DA	DA	A	DA	DA	A	A	SA	DA	A	DA	DA	DA	DA	DA	A	SD	SA	A	A	DA	SA
142	Chattogram Veterinary and Animal Sciences University	Male	20	Faridpur Sadar	Faridpur	Yes	Student	Higher	SA	SA	SA	DA	SA	SA	DA	SA	SA	SA	SA	DA	DA	DA	SA	SA	DA	DA	SA	SA	DA	SA	SA	SA	SA
143	Chattogram Veterinary and Animal Sciences University	Male	37	Faridpur Sadar	Faridpur	Yes	Businessman	Primary	A	DA	DA	DA	A	A	DA	DA	DA	SA	SA	A	DA	A	SA	DA	DA	A	SA	A	A	DA	A	DA	A
144	Chattogram Veterinary and Animal Sciences University	Female	38	Faridpur Sadar	Faridpur	Yes	Farmer	Primary	DA	A	A	DA	DA	SA	DA	SD	DA	DA	SA	DA	DA	SA	DA	DA	DA	DA	A	SD	SA	A	A	A	A
145	Chattogram Veterinary and Animal Sciences University	Male	48	Faridpur Sadar	Faridpur	Yes	Businessman	Higher	A	A	DA	DA	DA	DA	DA	DA	A	A	SA	A	A	DA	A	A	DA	DA	DA	DA	A	A	DA	DA	A
146	Chattogram Veterinary and Animal Sciences University	Male	45	Faridpur Sadar	Faridpur	Yes	Farmer	Primary	A	A	SA	SD	A	A	DA	DA	A	SA	SA	SD	SD	SD	SD	SD	SA	DA	DA	A	SD	SA	A	SD	A
147	Chattogram Veterinary and Animal Sciences University	Female	39	Faridpur Sadar	Faridpur	Yes	Businessman	Secondary	A	SA	SA	SA	SA	SA	DA	SD	DA	SA	SA	DA	A	A	A	DA	DA	SA	A	SD	SA	SA	SD	DA	DA
148	Chattogram Veterinary and Animal Sciences University	Female	30	Faridpur Sadar	Faridpur	Yes	Businessman	Secondary	SA	SA	DA	SD	DA	DA	DA	DA	DA	A	DA	DA	A	DA	DA	A	DA	DA	DA	SD	SA	A	SD	DA	SA
149	Chattogram Veterinary and Animal Sciences University	Male	36	Faridpur Sadar	Faridpur	Yes	Businessman	Secondary	SA	A	SA	DA	DA	DA	DA	DA	A	DA	DA	DA	A	A	DA	A	A	A	A	DA	A	A	A	A	A
150	Chattogram Veterinary and Animal Sciences University	Male	54	Faridpur Sadar	Faridpur	Yes	Businessman	Primary	A	SA	SD	SA	SA	DA	DA	DA	A	A	SA	A	DA	A	A	DA	DA	A	DA	SA	A	DA	A	SA	SA
151	Chattogram Veterinary and Animal Sciences University	Male	38	Faridpur Sadar	Faridpur	Yes	Businessman	Primary	DA	DA	DA	DA	A	A	A	DA	DA	A	SA	SA	DA	A	SA	A	DA	SA	DA	A	DA	DA	A	A	A
152	Chattogram Veterinary and Animal Sciences University	Male	32	Faridpur Sadar	Faridpur	Yes	Businessman	Secondary	SA	A	DA	DA	A	DA	DA	DA	DA	DA	SA	DA	A	SA	A	SA	A	A	DA	DA	A	DA	DA	A	A
153	Chattogram Veterinary and Animal Sciences University	Male	34	Saturia	Manikganj	No	Businessman	Secondary	SA	SA	DA	DA	A	DA	DA	DA	DA	A	SA	DA	DA	A	SA	DA	DA	A	DA	A	A	DA	DA	A	A
154	Chattogram Veterinary and Animal Sciences University	Male	48	Saturia	Manikganj	No	Service	Primary	SA	A	DA	SD	A	DA	DA	DA	DA	DA	SA	DA	DA	A	SA	DA	DA	DA	DA	DA	A	DA	DA	A	A
155	Chattogram Veterinary and Animal Sciences University	Male	32	Saturia	Manikganj	No	Farmer	Secondary	A	DA	A	DA	SD	SA	DA	A	A	A	DA	DA	DA	DA	A	DA	A	A	DA	SD	A	A	DA	A	DA
156	Chattogram Veterinary and Animal Sciences University	Male	29	Saturia	Manikganj	No	Service	Higher	DA	DA	A	DA	DA	A	DA	DA	DA	A	DA	SA	DA	A	A	A	A	A	A	DA	A	A	A	A	DA
157	Chattogram Veterinary and Animal Sciences University	Male	26	Saturia	Manikganj	No	Farmer	Primary	A	A	A	DA	DA	A	A	DA	A	DA	DA	A	DA	A	A	A	A	A	A	SD	A	DA	A	DA	DA
158	Chattogram Veterinary and Animal Sciences University	Male	22	Saturia	Manikganj	No	Student	Secondary	SD	DA	DA	SD	DA	SA	DA	SD	DA	DA	DA	SA	DA	SD	DA	A	A	SA	A	A	SD	SA	A	A	DA
159	Chattogram Veterinary and Animal Sciences University	Male	47	Saturia	Manikganj	No	Service	Secondary	A	DA	A	DA	DA	A	DA	DA	DA	A	SA	A	DA	SD	A	DA	DA	A	A	SA	A	A	A	SD	A
160	Chattogram Veterinary and Animal Sciences University	Male	33	Saturia	Manikganj	No	Farmer	Primary	A	DA	SD	SA	A	DA	A	DA	DA	A	SA	A	SD	A	A	A	A	SA	A	DA	SD	DA	A	A	DA
161	Chattogram Veterinary and Animal Sciences University	Female	29	Saturia	Manikganj	No	Student	Higher	DA	DA	DA	DA	DA	DA	DA	DA	SD	A	SA	SA	SA	SD	A	A	DA	A	A	SD	A	A	DA	DA	SA
162	Chattogram Veterinary and Animal Sciences University	Male	38	Saturia	Manikganj	No	Farmer	Primary	A	A	A	DA	SD	A	DA	DA	A	A	DA	A	SD	DA	A	DA	DA	A	DA	SD	A	A	DA	DA	DA
163	Chattogram Veterinary and Animal Sciences University	Male	35	Saturia	Manikganj	No	Student	Secondary	SD	DA	DA	SD	DA	SA	DA	DA	DA	DA	DA	SA	A	DA	A	A	SA	A	A	DA	A	A	A	A	DA
164	Chattogram Veterinary and Animal Sciences University	Male	34	Saturia	Manikganj	No	Farmer	Primary	A	DA	A	DA	DA	DA	DA	DA	A	DA	DA	A	SD	A	A	DA	DA	DA	DA	DA	SA	DA	DA	DA	DA
165	Chattogram Veterinary and Animal Sciences University	Male	46	Saturia	Manikganj	No	Farmer	Primary	SA	A	A	DA	A	A	A	DA	A	A	SA	A	DA	A	A	DA	A	DA	A	SD	A	DA	A	DA	DA
166	Chattogram Veterinary and Animal Sciences University	Male	34	Saturia	Manikganj	No	Farmer	Higher	A	DA	DA	DA	DA	SA	A	DA	DA	DA	DA	A	DA	DA	A	DA	DA	DA	DA	SD	A	DA	A	DA	DA
167	Chattogram Veterinary and Animal Sciences University	Male	41	Saturia	Manikganj	No	Businessman	Primary	SA	DA	A	DA	DA	SA	A	A	SA	DA	DA	A	DA	A	DA	A	DA	A	A	DA	A	DA	A	DA	DA
168	Chattogram Veterinary and Animal Sciences University	Male	36	Saturia	Manikganj	No	Farmer	Secondary	SA	A	A	DA	DA	SA	A	DA	A	A	A	DA	A	A	A	A	DA	A	DA	SA	DA	A	DA	DA	DA
169	Chattogram Veterinary and Animal Sciences University	Male	34	Saturia	Manikganj	No	Farmer	Primary	SA	A	SA	A	DA	SA	A	DA	A	DA	DA	A	DA	DA	A	DA	A	SA	A	DA	A	A	DA	DA	DA
170	Chattogram Veterinary and Animal Sciences University	Male	28	Saturia	Manikganj	No	Businessman	Secondary	DA	DA	DA	DA	SD	SA	DA	DA	DA	A	DA	SA	DA	DA	A	A	A	A	DA	DA	A	DA	A	A	A
171	Chattogram Veterinary and Animal Sciences University	Male	27	Saturia	Manikganj	No	Service	Higher	SD	DA	A	SD	DA	SA	DA	A	DA	DA	DA	A	A	DA	A	DA	A	DA	DA	DA	A	DA	DA	DA	SD
172	Chattogram Veterinary and Animal Sciences University	Male	30	Saturia	Manikganj	No	Businessman	Secondary	DA	DA	A	DA	DA	A	DA	A	DA	A	DA	A	DA	SD	A	A	A	A	A	SD	A	DA	A	DA	A
173	Chattogram Veterinary and Animal Sciences University	Male	32	Saturia	Manikganj	No	Farmer	Primary	SA	A	SA	DA	DA	SA	DA	A	A	DA	SA	SA	DA	A	A	DA	DA	DA	DA	SD	SA	DA	DA	DA	DA
174	Chattogram Veterinary and Animal Sciences University	Male	39	Saturia	Manikganj	No	Farmer	Primary	SA	A	SA	A	DA	A	DA	DA	A	DA	DA	A	DA	DA	A	A	SA	DA	A	SD	SA	A	DA	DA	DA
175	Chattogram Veterinary and Animal Sciences University	Male	25	Saturia	Manikganj	No	Service	Secondary	DA	DA	DA	DA	DA	SA	DA	SD	DA	A	DA	SA	DA	A	A	A	A	DA	A	SD	SA	A	A	A	DA
176	Chattogram Veterinary and Animal Sciences University	Male	45	Saturia	Manikganj	No	Farmer	Primary	SA	A	A	DA	DA	SA	SD	DA	A	DA	DA	A	SD	A	DA	DA	A	DA	A	SD	SA	A	DA	DA	A
177	Chattogram Veterinary and Animal Sciences University	Male	39	Saturia	Manikganj	No	Student	Secondary	DA	A	A	DA	DA	SA	DA	A	DA	A	DA	A	A	DA	A	SA	DA	SA	A	DA	A	DA	A	DA	DA
178	Chattogram Veterinary and Animal Sciences University	Male	38	Saturia	Manikganj	No	Farmer	Secondary	A	DA	A	DA	SD	SA	DA	DA	A	DA	DA	A	SD	DA	A	A	DA	DA	DA	SD	SA	A	DA	A	DA
179	Chattogram Veterinary and Animal Sciences University	Male	33	Saturia	Manikganj	No	Farmer	Primary	SA	DA	SA	A	DA	SA	DA	A	A	DA	DA	A	DA	A	A	A	A	A	DA	SD	SA	DA	A	DA	DA
180	Chattogram Veterinary and Animal Sciences University	Male	39	Saturia	Manikganj	No	Businessman	Primary	A	A	SA	DA	DA	SA	DA	SD	DA	A	DA	A	SD	A	SA	DA	DA	DA	A	SD	SA	DA	DA	DA	DA
181	Chattogram Veterinary and Animal Sciences University	Male	24	Saturia	Manikganj	No	Businessman	Primary	DA	DA	DA	SA	DA	SA	DA	SD	DA	A	DA	A	A	DA	A	SA	A	A	SA	SD	A	A	DA	A	DA
182	Chattogram Veterinary and Animal Sciences University	Male	40	Saturia	Manikganj	No	Farmer	Primary	SA	A	A	DA	DA	A	DA	A	SA	DA	DA	A	DA	DA	A	A	A	DA	DA	SD	SA	DA	A	DA	DA
183	Chattogram Veterinary and Animal Sciences University	Male	42	Saturia	Manikganj	No	Businessman	Primary	A	DA	A	A	SD	SA	DA	DA	A	DA	SA	DA	DA	A	DA	A	DA	A	DA	A	DA	DA	A	DA	A
184	Chattogram Veterinary and Animal Sciences University	Male	28	Saturia	Manikganj	No	Farmer	Primary	SA	DA	A	DA	SD	A	SD	DA	A	DA	DA	A	DA	A	DA	A	A	A	DA	A	A	A	SD	A	DA
185	Chattogram Veterinary and Animal Sciences University	Female	32	Saturia	Manikganj	No	Farmer	Secondary	A	A	SA	DA	DA	SA	A	A	DA	A	DA	A	DA	DA	A	SA	DA	A	DA	SD	A	A	A	A	DA
186	Chattogram Veterinary and Animal Sciences University	Female	37	Saturia	Manikganj	No	Farmer	Primary	SA	SA	A	SA	A	A	SD	DA	SD	A	DA	DA	A	A	DA	DA	DA	DA	DA	SD	A	A	DA	A	DA
187	Chattogram Veterinary and Animal Sciences University	Female	40	Saturia	Manikganj	No	Service	Primary	A	A	DA	DA	A	DA	A	A	A	DA	DA	DA	A	A	A	A	A	DA	A	DA	A	A	DA	DA	SA
188	Chattogram Veterinary and Animal Sciences University	Male	35	Saturia	Manikganj	No	Farmer	Primary	A	DA	DA	DA	DA	A	DA	DA	DA	A	SA	DA	A	A	A	A	DA	A	DA	DA	A	DA	DA	A	A
189	Chattogram Veterinary and Animal Sciences University	Male	40	Saturia	Manikganj	No	Farmer	Higher	SA	A	DA	A	A	DA	DA	DA	A	SA	A	A	A	A	A	A	A	DA	DA	SD	SA	A	A	A	A
190	Chattogram Veterinary and Animal Sciences University	Female	42	Saturia	Manikganj	No	Farmer	Primary	SA	SA	SD	SA	DA	A	DA	SD	SA	DA	DA	A	DA	A	A	SD	SD	A	DA	DA	SD	A	DA	A	DA
191	Chattogram Veterinary and Animal Sciences University	Male	46	Saturia	Manikganj	No	Farmer	Primary	A	A	DA	DA	A	A	DA	DA	A	A	SA	A	DA	DA	A	A	DA	DA	A	SD	SA	DA	DA	A	A
192	Chattogram Veterinary and Animal Sciences University	Male	29	Saturia	Manikganj	No	Student	Higher	SA	SA	SA	SD	SD	SD	SA	SA	SA	SA	SD	SA	SA	A	A	SA	SD	DA	SA	SA	A	A	SA	SA	SA
193	Chattogram Veterinary and Animal Sciences University	Female	39	Saturia	Manikganj	No	Student	Higher	SA	SA	SA	DA	SD	SD	SA	SA	SA	SA	SD	SA	SA	A	SA	SA	SD	DA	A	SD	SA	SA	DA	SA	SA
194	Chattogram Veterinary and Animal Sciences University	Female	34	Saturia	Manikganj	No	Student	Higher	SA	SA	SD	DA	A	A	SA	DA	A	A	SA	SD	SD	A	A	SA	DA	A	SA	SA	SA	A	A	SA	SA
195	Chattogram Veterinary and Animal Sciences University	Male	28	Saturia	Manikganj	No	Farmer	Primary	SA	DA	SA	SA	SD	SD	DA	A	A	DA	DA	A	SD	SD	SD	SD	SD	SA	DA	A	SD	SA	SA	A	A
196	Chattogram Veterinary and Animal Sciences University	Female	29	Saturia	Manikganj	No	Student	Higher	SA	SA	SA	DA	DA	DA	SA	SD	A	A	SD	SD	SD	A	A	A	A	DA	SA	A	SA	A	DA	A	SA
197	Chattogram Veterinary and Animal Sciences University	Male	37	Saturia	Manikganj	No	Service	Higher	SA	SA	A	A	DA	A	A	DA	SA	DA	SD	SD	A	SA	A	SD	SA	A	A	A	A	SA	A	A	SD
198	Chattogram Veterinary and Animal Sciences University	Male	24	Saturia	Manikganj	No	Service	Secondary	SA	SA	SD	SD	SD	SD	SA	SD	DA	A	DA	A	SD	SA	DA	A	SA	A	SD	A	A	DA	SA	SA	SA
199	Chattogram Veterinary and Animal Sciences University	Male	36	Saturia	Manikganj	No	Service	Higher	SA	SA	SA	SD	DA	SA	DA	DA	A	DA	A	DA	DA	A	DA	A	SA	A	SA	A	A	A	DA	SA	SA
200	Chattogram Veterinary and Animal Sciences University	Female	54	Saturia	Manikganj	No	Farmer	Primary	DA	A	A	SD	A	SA	DA	DA	A	A	DA	SA	A	DA	A	DA	DA	DA	A	SA	A	A	DA	DA	SA
201	Chattogram Veterinary and Animal Sciences University	Male	27	Saturia	Manikganj	No	Student	Secondary	SA	A	SA	SD	A	DA	DA	DA	SA	SA	SA	DA	DA	A	SA	DA	DA	A	A	DA	A	A	A	A	A
202	Chattogram Veterinary and Animal Sciences University	Male	21	Saturia	Manikganj	No	Student	Higher	A	SA	SA	DA	DA	DA	A	DA	DA	DA	SD	A	SA	A	SA	DA	A	SA	DA	DA	DA	SA	DA	SA	DA
203	Chattogram Veterinary and Animal Sciences University	Male	20	Saturia	Manikganj	No	Student	Higher	DA	SD	A	DA	A	SD	DA	DA	DA	A	DA	A	A	A	SA	SD	A	SA	DA	DA	SD	A	DA	SA	SD
204	Chattogram Veterinary and Animal Sciences University	Female	39	Saturia	Manikganj	No	Student	Secondary	A	DA	SD	SD	A	SD	SD	SD	SD	SA	SA	DA	DA	A	SA	A	A	DA	A	A	A	A	DA	DA	DA
205	Chattogram Veterinary and Animal Sciences University	Male	34	Saturia	Manikganj	No	Student	Higher	A	DA	A	DA	DA	DA	DA	DA	DA	DA	DA	A	A	DA	A	A	DA	A	DA	SD	A	SD	SD	A	DA
206	Chattogram Veterinary and Animal Sciences University	Male	39	Saturia	Manikganj	No	Farmer	Primary	A	A	SD	SD	SD	DA	A	SD	A	SA	DA	SA	A	DA	DA	DA	A	A	DA	DA	SA	SA	A	A	A
207	Chattogram Veterinary and Animal Sciences University	Male	28	Saturia	Manikganj	No	Farmer	Primary	A	A	DA	SD	DA	A	DA	DA	DA	A	SA	A	DA	DA	A	A	DA	DA	A	A	SA	A	A	DA	SA
208	Chattogram Veterinary and Animal Sciences University	Male	40	Saturia	Manikganj	No	Farmer	Primary	A	A	DA	SD	SD	DA	DA	DA	A	A	DA	A	DA	A	A	DA	DA	A	DA	A	SA	A	A	A	A
	A=Agree; SA=Strongly Agree; DA=Disagree; SD=Strongly Disagree
